# Supplementary material
Source: PubMed Central journal article supplement (PMC4807415)
Supplement: ijbsv12p0545s1.pdf [file ijbsv12p0545s1.pdf]

## **Supplementary Figure Legends**

**Figure S1.** Western blotting results for OTUB1 in fractioned cytoplasm and nucleus samples from AGS and HGC-27 cells. SP1 was used as the endogenous control for the nucleus and Actin was used as the endogenous control for the cytoplasm.

**Figure S2.** The regular PCR was performed with specific primers for OTUB (A) and OTUB1-isoform 2 (B). The regular PCR products were showed by DNA electrophoresis (Top) and sent for sequencing (Bottom).

**Figure S3.** AGS and HGC-27 cell morphologies before and after OTUB1-isoform 2 infection. (A) AGS cells before infection. (B) AGS cells after infection. (C) HGC-27 cells before infection. (D) HGC-27 cells after infection.

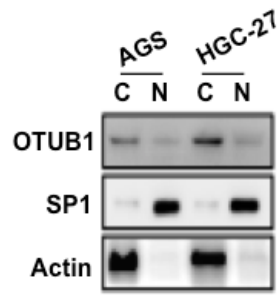

**Figure S1**

A.

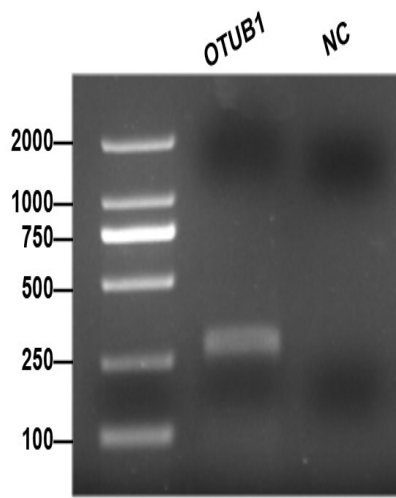

B.

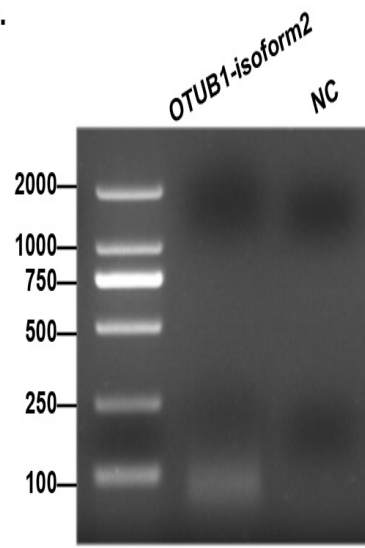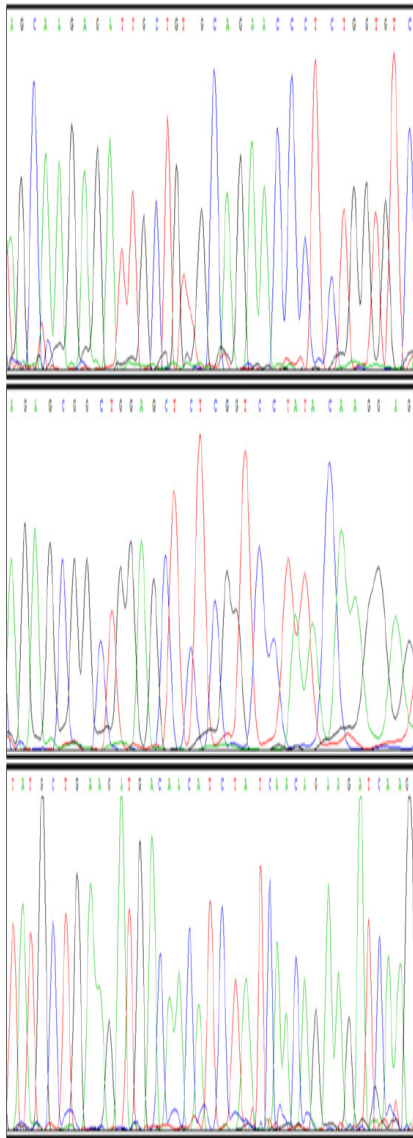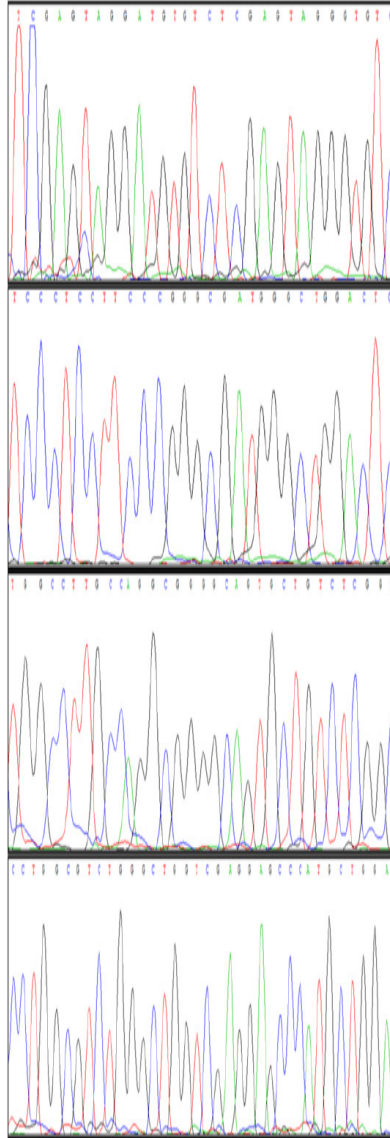

Figure S2

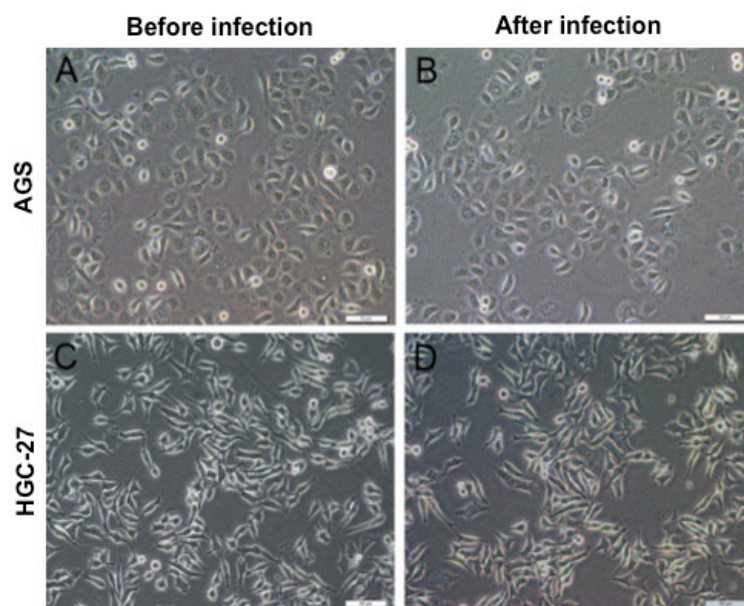

**Figure S3**
